# Supplementary material for: Water-soluble binary and ternary palladium(ıı) complexes containing amino acids and intercalating ligands: synthesis, characterization, biomolecular interactions and cytotoxicities
Source: Royal Society of Chemistry journal article supplement (doi:10.1039/c8nj05934a), 2019-01-01
Supplement: c8nj05934a1.pdf [file c8nj05934a1.pdf]

# **Water soluble binary and ternary palladium(II) complexes containing amino acids and intercalating ligands: Synthesis, characterization, biomolecular interactions and cytotoxicities**

**Duygu İnci,<sup>a</sup> Rahmiye Aydın,<sup>a,\*</sup> Özgür Vatan,<sup>b</sup> Onur Şahin<sup>c</sup> and Nilüfer Çinkılıç<sup>b</sup>**

<sup>a</sup>*Department of Chemistry, Faculty of Arts and Sciences, Uludag University, 16059 Bursa, Turkey*

<sup>b</sup>*Department of Biology, Faculty of Arts and Sciences, Uludag University, 16059 Bursa, Turkey*

<sup>c</sup>*Scientific and Technological Research Application and Research Center, Sinop University, 57000 Sinop, Turkey*

\*Corresponding author.

E-mail address: rahmiye@uludag.edu.tr (Rahmiye AYDIN).

## Supplementary Material

Crystallographic data for the structural analysis have been deposited with the Cambridge Crystallographic Data Centre, CCDC No. 1810954 for the complex **1** and 1810955 for the complex **4**. Copies of this information may be obtained free of charge from the Director, CCDC, 12 Union Road, Cambridge CB2 1EZ, UK (fax: +44-1223-336033; e-mail: [deposit@ccdc.cam.ac.uk](mailto:deposit@ccdc.cam.ac.uk) or www: <http://www.ccdc.cam.ac.uk>).

**Table S1** Selected bond lengths (Å) and bond angles (°) for the complexes **1** and **4**

| <b>Complex 1</b>       |            |                        |            |
|------------------------|------------|------------------------|------------|
| Pd1-N2                 | 2.041(2)   | Pd1-N1                 | 2.043(2)   |
| N2-Pd1-N1              | 81.04(9)   | N2-Pd1-N1 <sup>i</sup> | 165.53(9)  |
| N1-Pd1-N1 <sup>i</sup> | 101.15(14) |                        |            |
| <b>Complex 4</b>       |            |                        |            |
| N1-Pd1                 | 2.024(5)   | N2-Pd1                 | 2.034(5)   |
| O1-Pd1                 | 1.989(4)   | Pd1-N3                 | 2.036(5)   |
| O1-Pd1-N1              | 176.79(18) | O1-Pd1-N2              | 95.32(18)  |
| N1-Pd1-N2              | 81.80(19)  | O1-Pd1-N3              | 82.50(18)  |
| N1-Pd1-N3              | 100.42(19) | N2-Pd1-N3              | 177.15(19) |

Symmetry code: (i)  $-x+1, y, -z+1/2$  for the complex **1**.

**Table S2** Hydrogen-bond parameters for the complexes **1** and **4**

| D-H···A                   | D-H      | H···A    | D···A      | D-H···A |
|---------------------------|----------|----------|------------|---------|
| <b>Complex 1</b>          |          |          |            |         |
| C1—H1···O2 <sup>iii</sup> | 0.93     | 2.57     | 3.082 (10) | 115     |
| C2—H2···O2 <sup>iii</sup> | 0.93     | 2.43     | 3.011 (9)  | 121     |
| <b>Complex 4</b>          |          |          |            |         |
| C1—H1···O2 <sup>i</sup>   | 0.93     | 2.57     | 3.165 (8)  | 122     |
| C1—H1···O6 <sup>ii</sup>  | 0.93     | 2.52     | 3.203 (11) | 130     |
| C9—H9···O6 <sup>iii</sup> | 0.93     | 2.51     | 3.238 (10) | 135     |
| O3—H3C···O5               | 0.82     | 2.31     | 3.084 (12) | 156     |
| N3—H3A···O2 <sup>i</sup>  | 0.91     | 2.02     | 2.881 (6)  | 159     |
| N3—H3B···O5 <sup>ii</sup> | 0.85     | 2.39     | 3.122 (9)  | 144     |
| N3—H3B···O6 <sup>ii</sup> | 0.85     | 2.28     | 3.104 (9)  | 161     |
| O4—H4B···O7 <sup>iv</sup> | 0.84 (2) | 2.02 (5) | 2.834 (13) | 162     |

Symmetry codes: (iii)  $-x+1, -y, -z+1$  for **1**; (i)  $x+1/2, -y+1/2, z+1/2$ ; (ii)  $x-1/2, -y+1/2, z-1/2$ ; (iii)  $x-1/2, -y+1/2, z-3/2$ ; (iv)  $x, y, z-1$  for **4**.

**Table S3**  $\pi \cdots \pi$  interactions distances for the complexes **1** and **4** (Å)

| Cg(I)            | Cg(J)               | Cg-Cg       | Perpendicular distance |
|------------------|---------------------|-------------|------------------------|
| <b>Complex 1</b> |                     |             |                        |
| Cg(3)            | Cg(4) <sup>i</sup>  | 3.7289 (18) | 3.4561 (11)            |
| Cg(4)            | Cg(5) <sup>i</sup>  | 3.8374 (17) | 3.3531 (11)            |
| Cg(4)            | Cg(5) <sup>ii</sup> | 3.6678 (17) | 3.3457 (11)            |
| Cg(5)            | Cg(5) <sup>i</sup>  | 3.6293 (18) | 3.4207 (11)            |
| Cg(5)            | Cg(5) <sup>ii</sup> | 3.9389 (18) | 3.4009 (11)            |
| <b>Complex 4</b> |                     |             |                        |
| Cg(3)            | Cg(4) <sup>i</sup>  | 3.671 (4)   | 3.470 (3)              |
| Cg(4)            | Cg(5) <sup>i</sup>  | 3.734 (4)   | 3.457 (3)              |
| Cg(4)            | Cg(6) <sup>ii</sup> | 3.715 (4)   | 3.415 (4)              |

Symmetry codes: (i)  $1/2-x, 1/2-y, -z$ ; (ii)  $1/2-x, 1/2-y, 1-z$ ; Cg(3)=N1/C1/C2/C3/C4/C12; Cg(2)=N2/C7/C8/C9/C10/C11; Cg(5)=C4/C5/C6/C7/C11/C12 for **1**; (i)  $1-x, 1-y, -z$ ; (ii)  $1/2+x, 1/2-y, -1/2+z$ ; Cg(3)=N1/C1/C2/C3/C4/C12; Cg(4)=N2/C7/C8/C9/C10/C11; Cg(5)=C4/C5/C6/C7/C11/C12; Cg(6)=C16-C21 for **4**.

a)

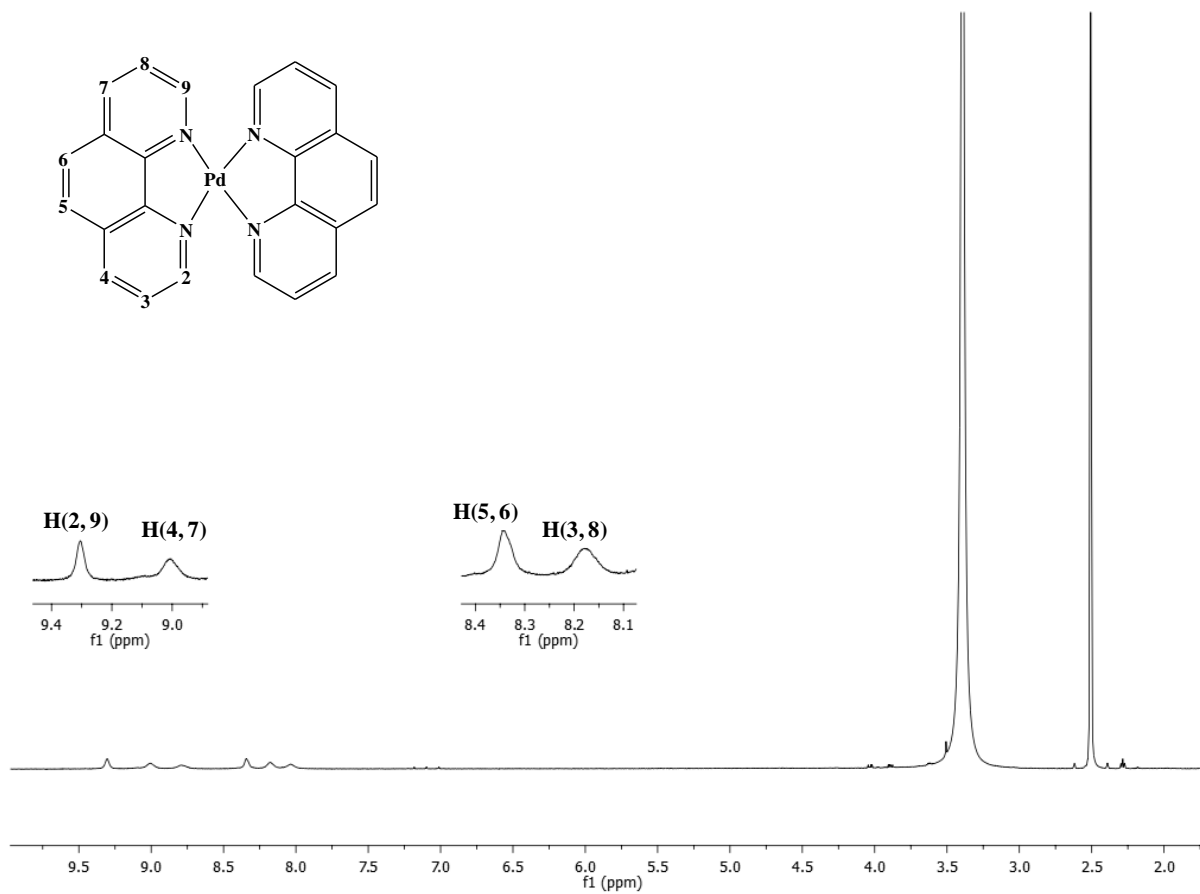

b)

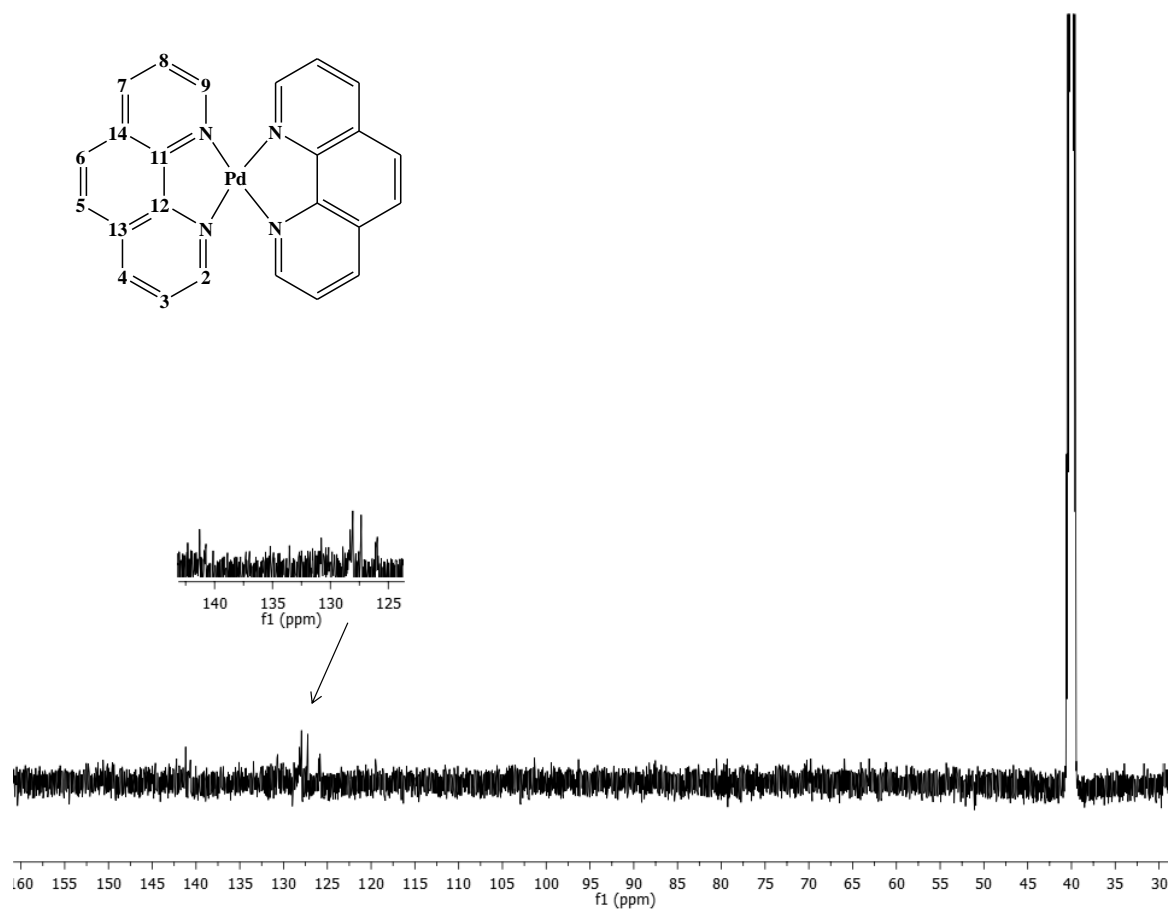

**Fig. S1 a)** <sup>1</sup>H NMR spectra and **b)** <sup>13</sup>C NMR spectra of the complex **1**

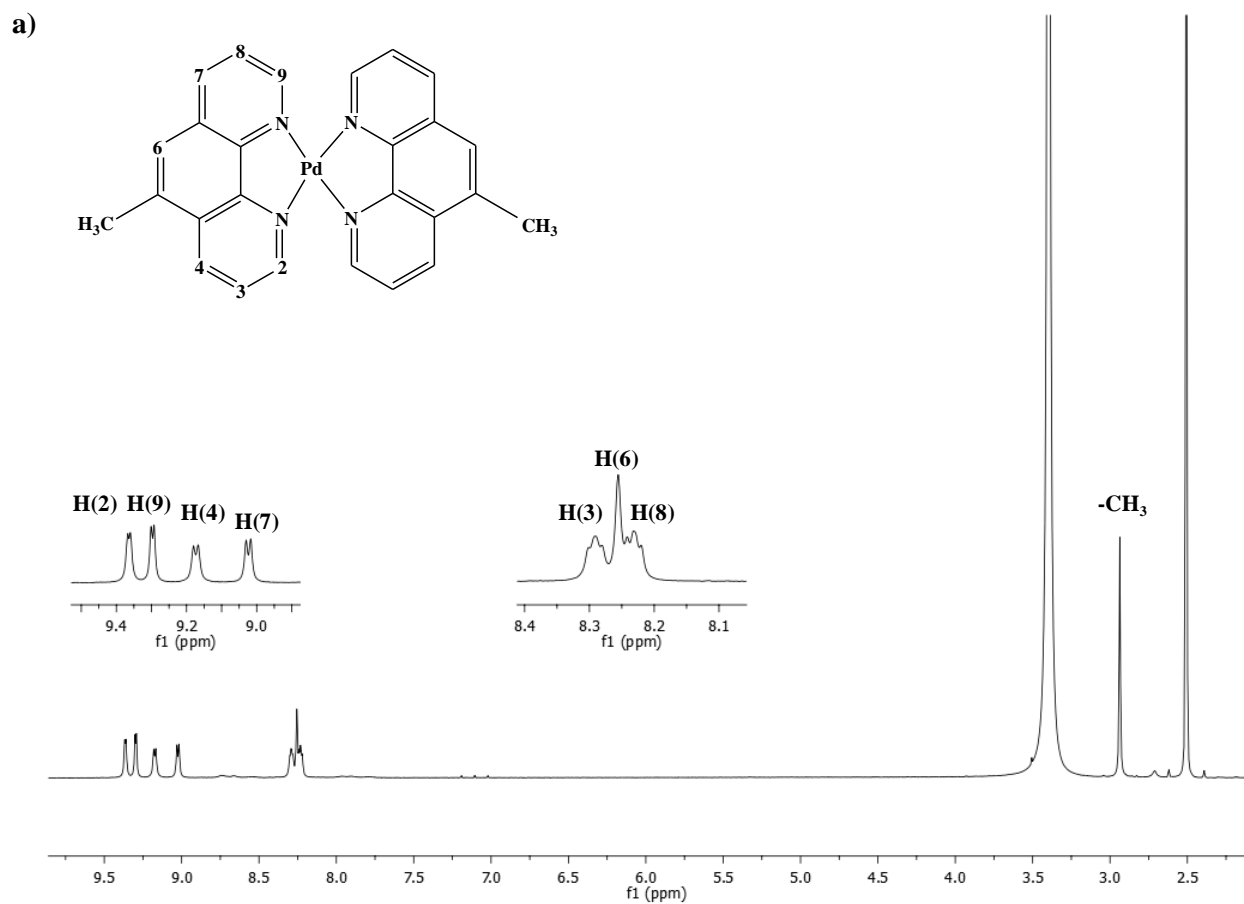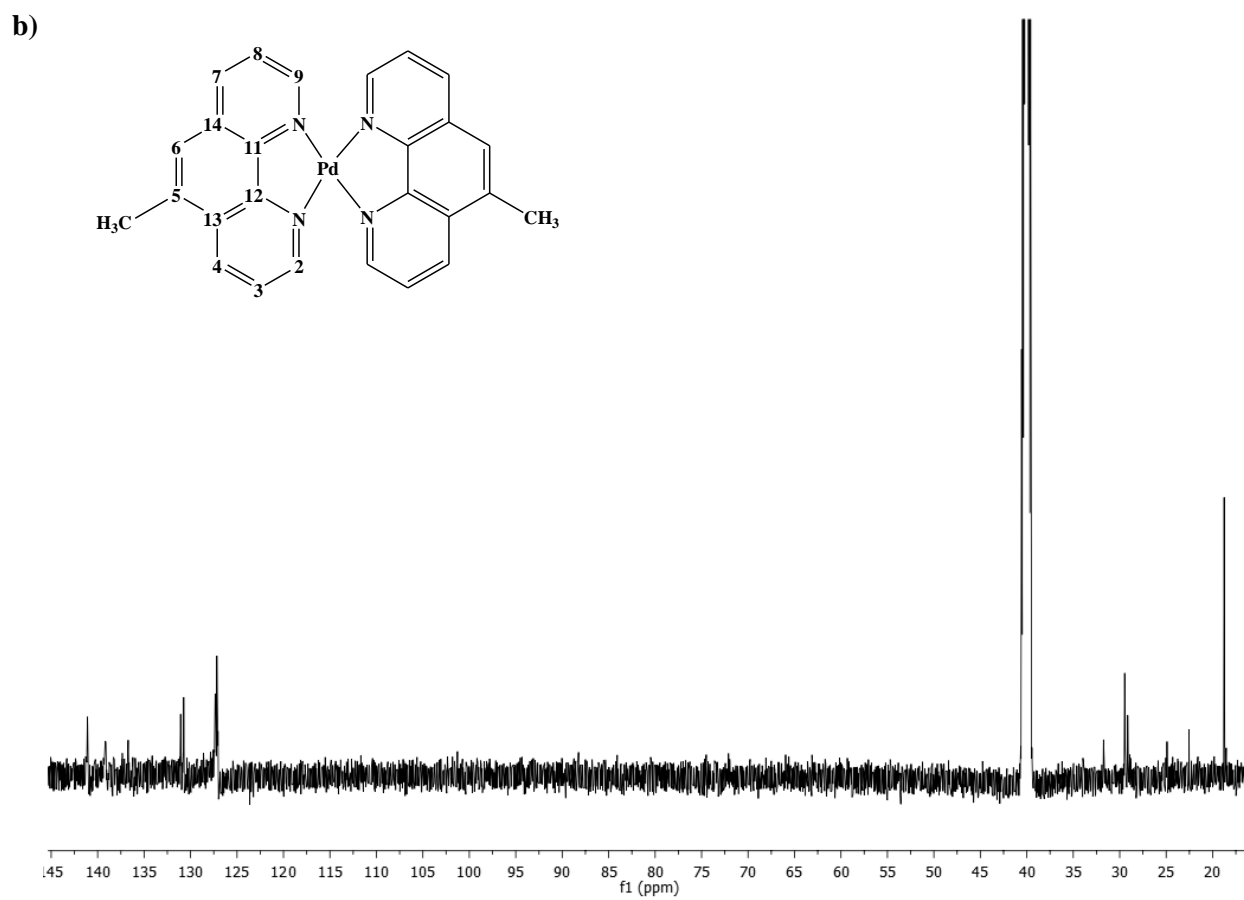

Fig. S2 a) <sup>1</sup>H NMR spectra and b) <sup>13</sup>C NMR spectra of the complex 2

a)

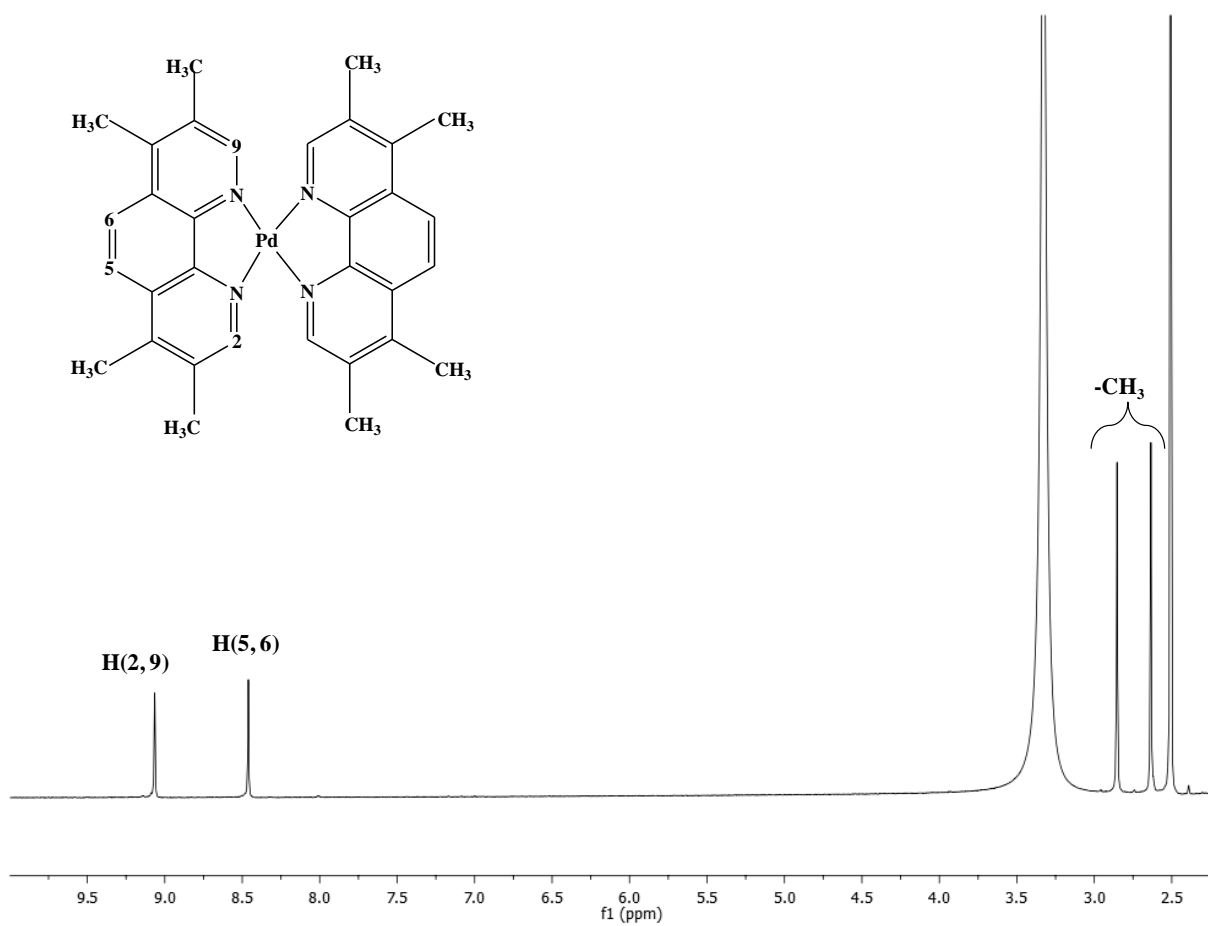

b)

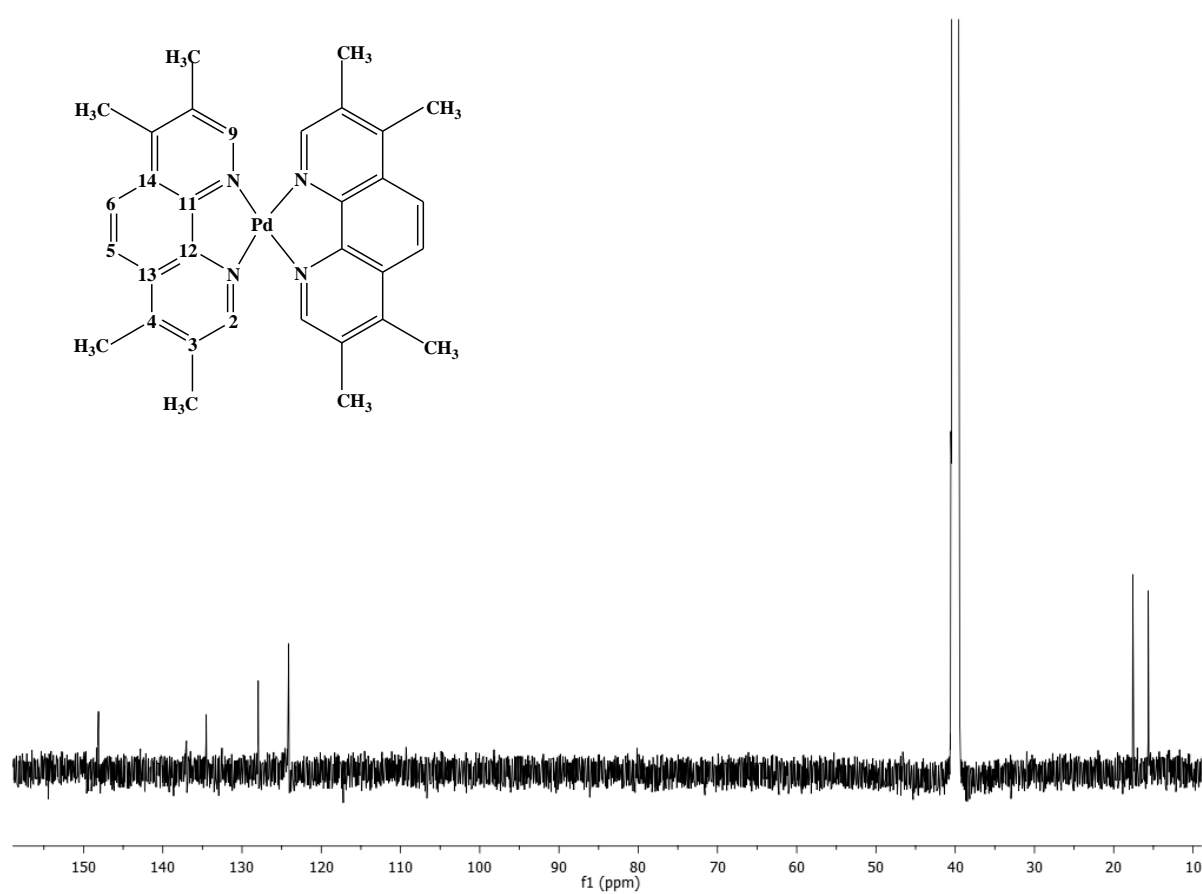

Fig. S3 a) <sup>1</sup>H NMR spectra and b) <sup>13</sup>C NMR spectra of the complex **3**

a)

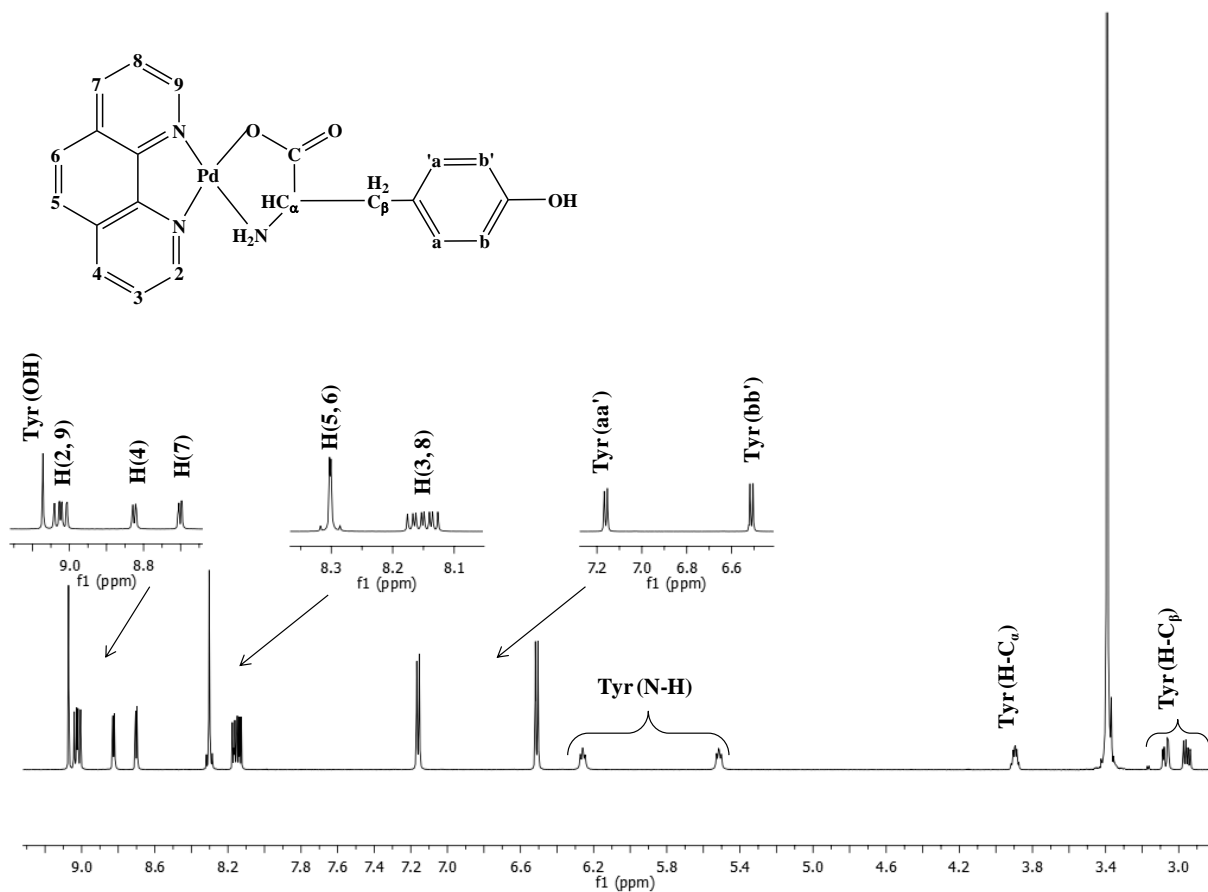

b)

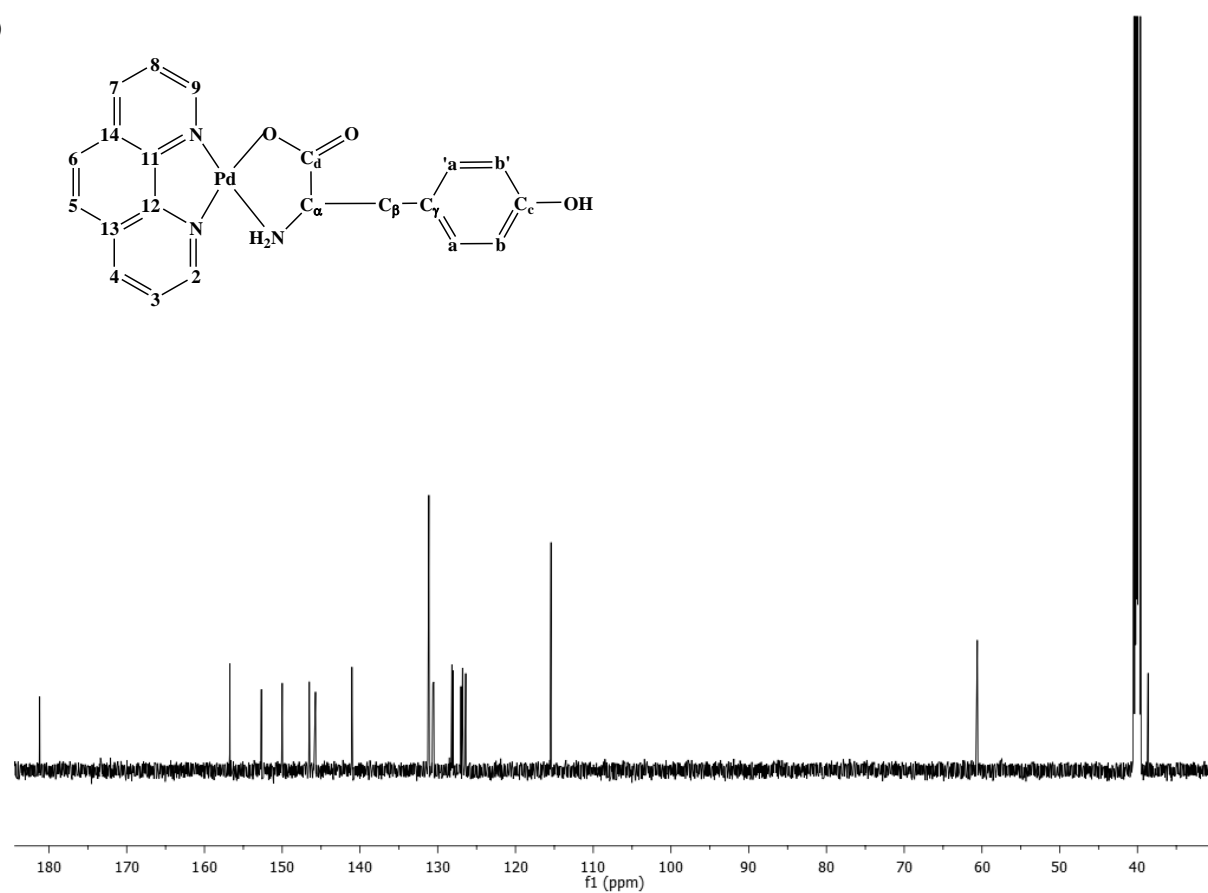

Fig. S4 a) <sup>1</sup>H NMR spectra and b) <sup>13</sup>C NMR spectra of the complex 4

a)

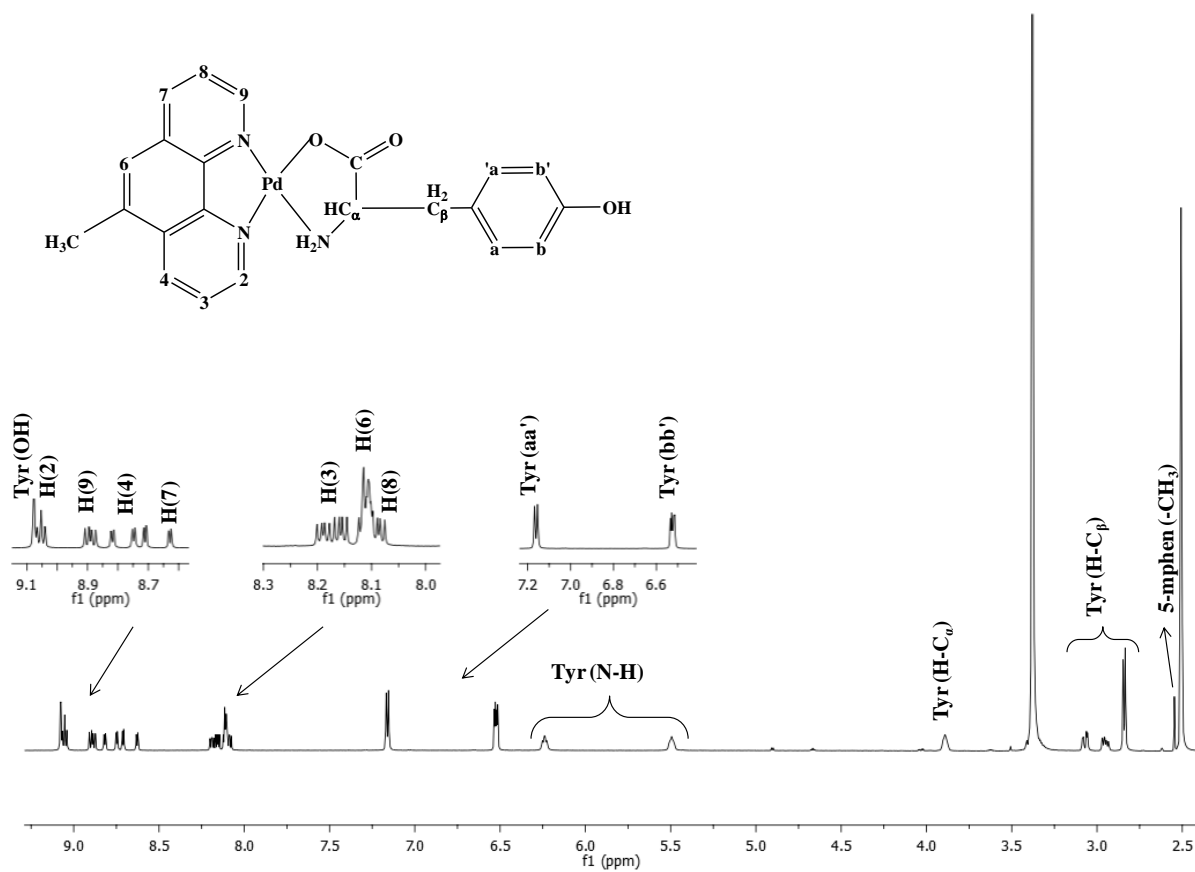

b)

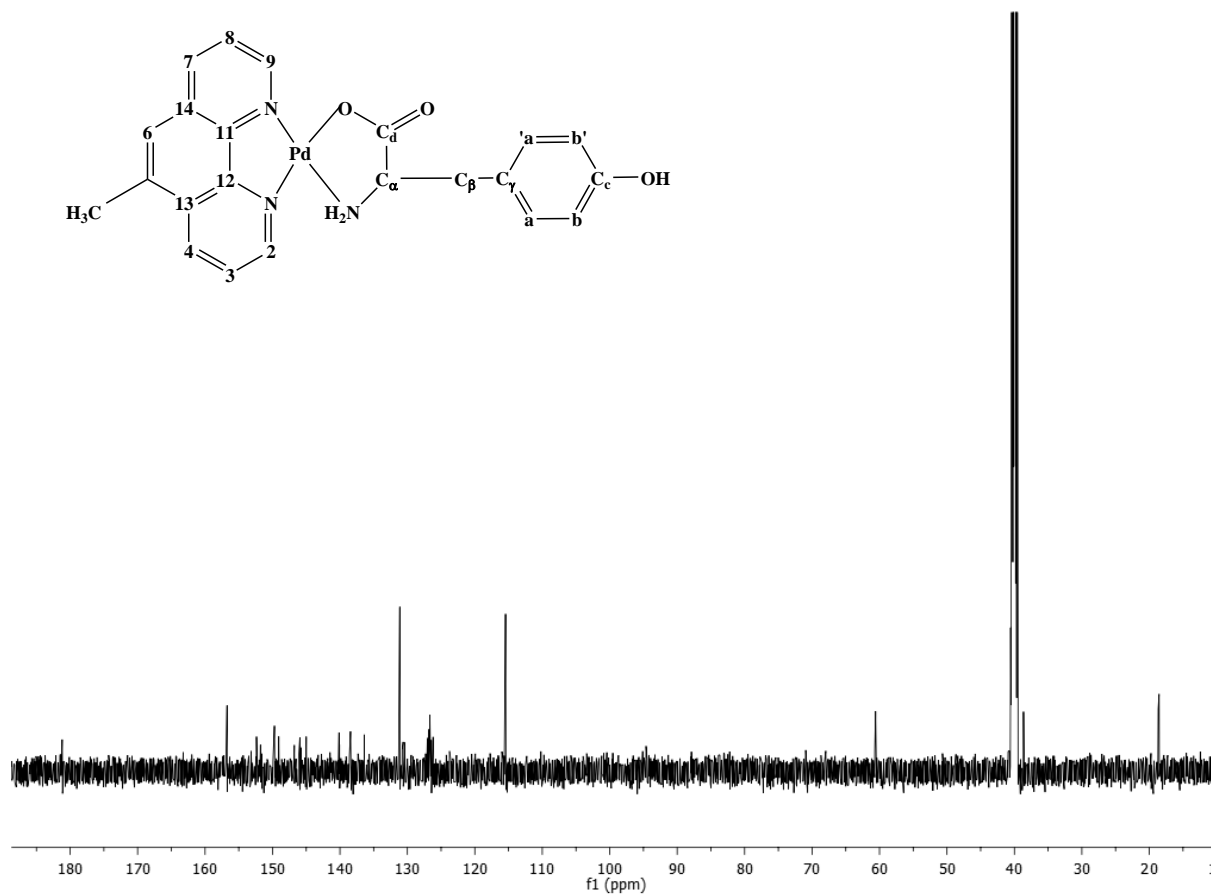

Fig. S5 a)  $^1\text{H}$  NMR spectra and b)  $^{13}\text{C}$  NMR spectra of the complex 5



a)

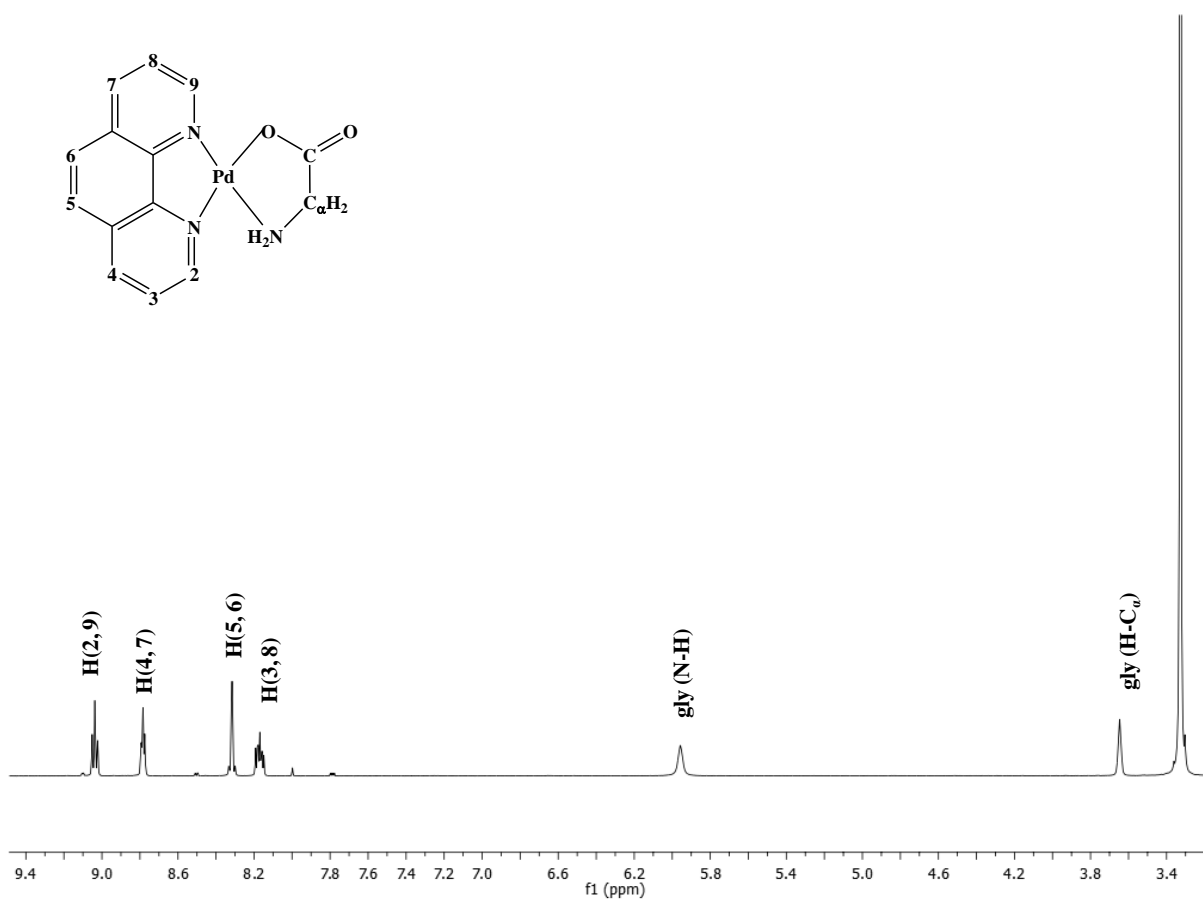

b)

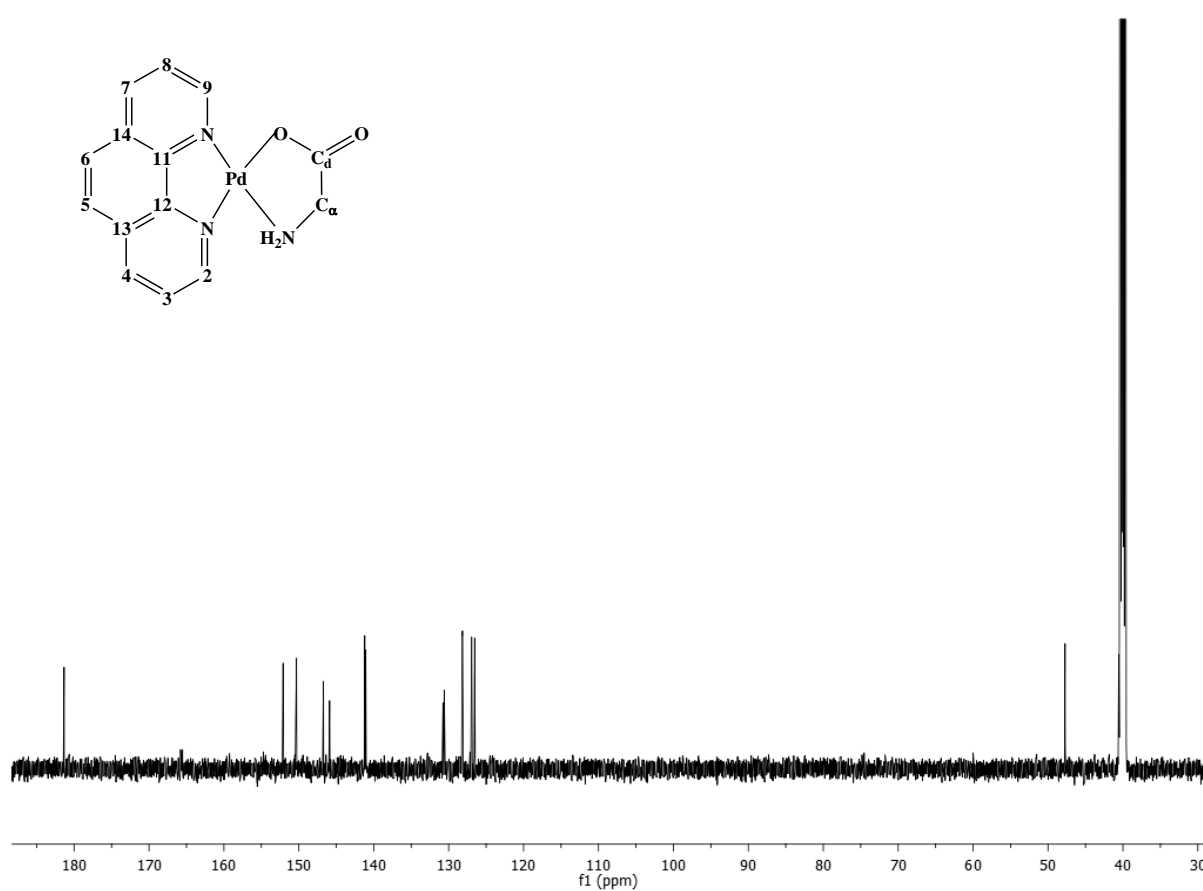

**Fig. S6 a)**  $^1\text{H}$  NMR spectra and **b)**  $^{13}\text{C}$  NMR spectra of the complex **6**

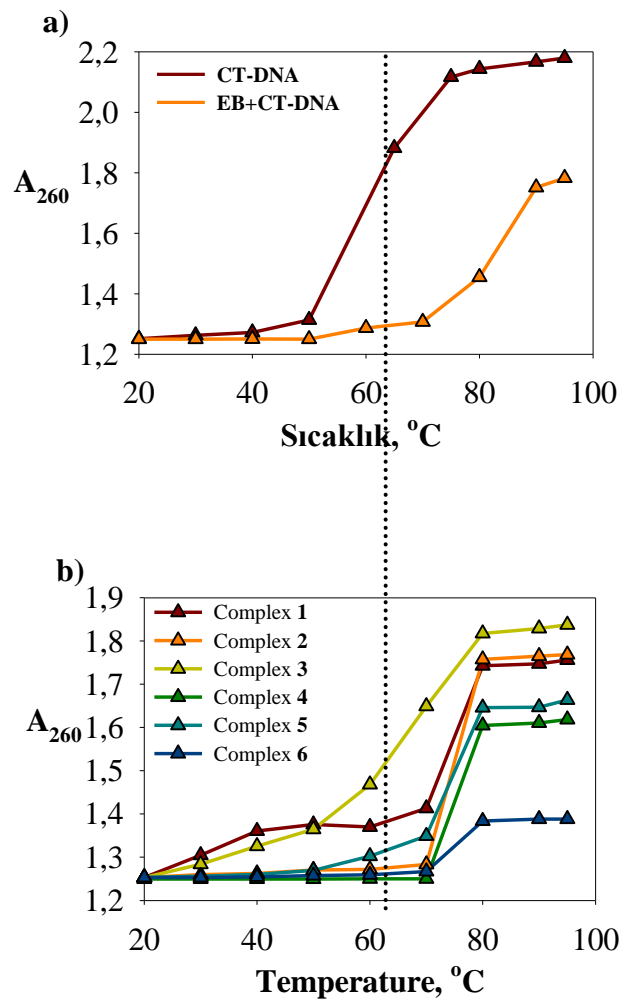

**Fig. S7** Thermal denaturation curves of **a)** CT-DNA and EB+CT-DNA, **b)** CT-DNA+the complexes **1-6** systems

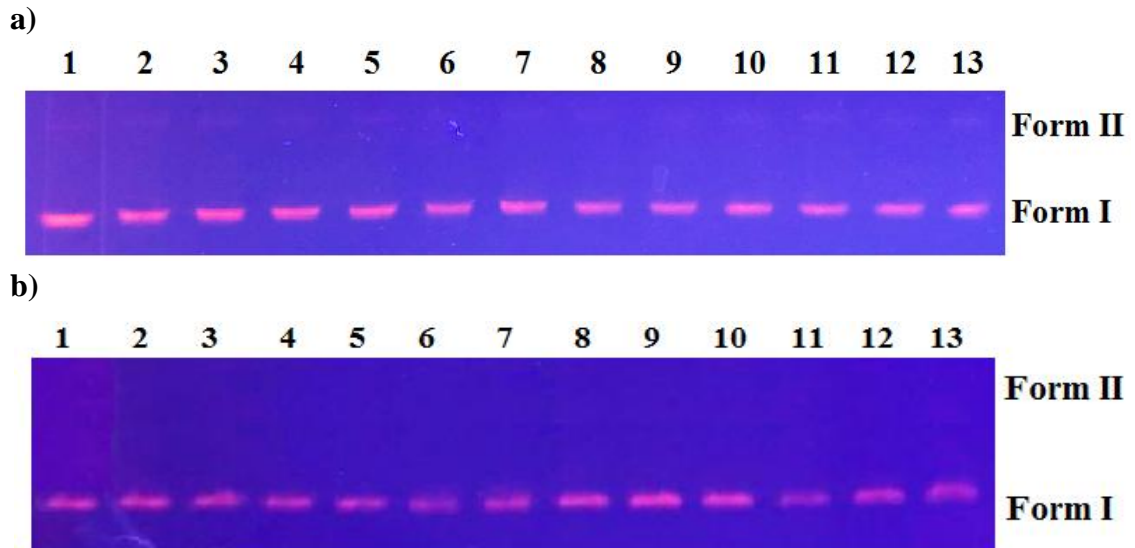

**Fig. S8** Agarose gel electrophoresis diagrams. Cleavage of pUC19 plasmid DNA induced by the complexes 1-6: **Fig. S8a** **Line 1:** Control pUC19 plasmid DNA + H<sub>2</sub>O<sub>2</sub> (1 μM) **Line 2:** pUC19 plasmid DNA + the complex 1 (1 μM) + H<sub>2</sub>O<sub>2</sub> (1 μM) **Line 3:** pUC19 plasmid DNA + the complex 1 (500 μM) + H<sub>2</sub>O<sub>2</sub> (1 μM) **Line 4:** pUC19 plasmid DNA + the complex 2 (1 μM) + H<sub>2</sub>O<sub>2</sub> (1 μM) **Line 5:** pUC19 plasmid DNA + the complex 2 (500 μM) + H<sub>2</sub>O<sub>2</sub> (1 μM) **Line 6:** pUC19 plasmid DNA + the complex 3 (1 μM) + H<sub>2</sub>O<sub>2</sub> (1 μM) **Line 7:** pUC19 plasmid DNA + the complex 3 (500 μM) + H<sub>2</sub>O<sub>2</sub> (1 μM) **Line 8:** pUC19 plasmid DNA + the complex 4 (1 μM) + H<sub>2</sub>O<sub>2</sub> (1 μM) **Line 9:** pUC19 plasmid DNA + the complex 4 (500 μM) + H<sub>2</sub>O<sub>2</sub> (1 μM) **Line 10:** pUC19 plasmid DNA + the complex 5 (1 μM) + H<sub>2</sub>O<sub>2</sub> (1 μM) **Line 11:** pUC19 plasmid DNA + the complex 5 (500 μM) + H<sub>2</sub>O<sub>2</sub> (1 μM) **Line 12:** pUC19 plasmid DNA + the complex 6 (1 μM) + H<sub>2</sub>O<sub>2</sub> (1 μM) **Line 13:** pUC19 plasmid DNA + the complex 6 (500 μM) + H<sub>2</sub>O<sub>2</sub> (1 μM). **Fig. S8b** **Line 1:** Control pUC19 plasmid DNA + DMSO (1 μM) **Line 2:** pUC19 plasmid DNA + the complex 1 (1 μM) + DMSO (1 μM) **Line 3:** pUC19 plasmid DNA + the complex 1 (100 μM) + H<sub>2</sub>O<sub>2</sub> (1 μM) **Line 4:** pUC19 plasmid DNA + the complex 2 (1 μM) + DMSO (1 μM) **Line 5:** pUC19 plasmid DNA + the complex 2 (100 μM) + DMSO (1 μM) **Line 6:** pUC19 plasmid DNA + the complex 3 (1 μM) + DMSO (1 μM) **Line 7:** pUC19 plasmid DNA + the complex 3 (100 μM) + DMSO (1 μM) **Line 8:** pUC19 plasmid DNA + the complex 4 (1 μM) + DMSO (1 μM) **Line 9:** pUC19 plasmid DNA + the complex 4 (100 μM) + DMSO (1 μM) **Line 10:** pUC19 plasmid DNA + the complex 5 (1 μM) + DMSO (1 μM) **Line 11:** pUC19 plasmid DNA + the complex 5 (100 μM) + DMSO (1 μM) **Line 12:** pUC19 plasmid DNA + the complex 6 (1 μM) + DMSO (1 μM) **Line 13:** pUC19 plasmid DNA + the complex 6 (100 μM) + DMSO (1 μM).

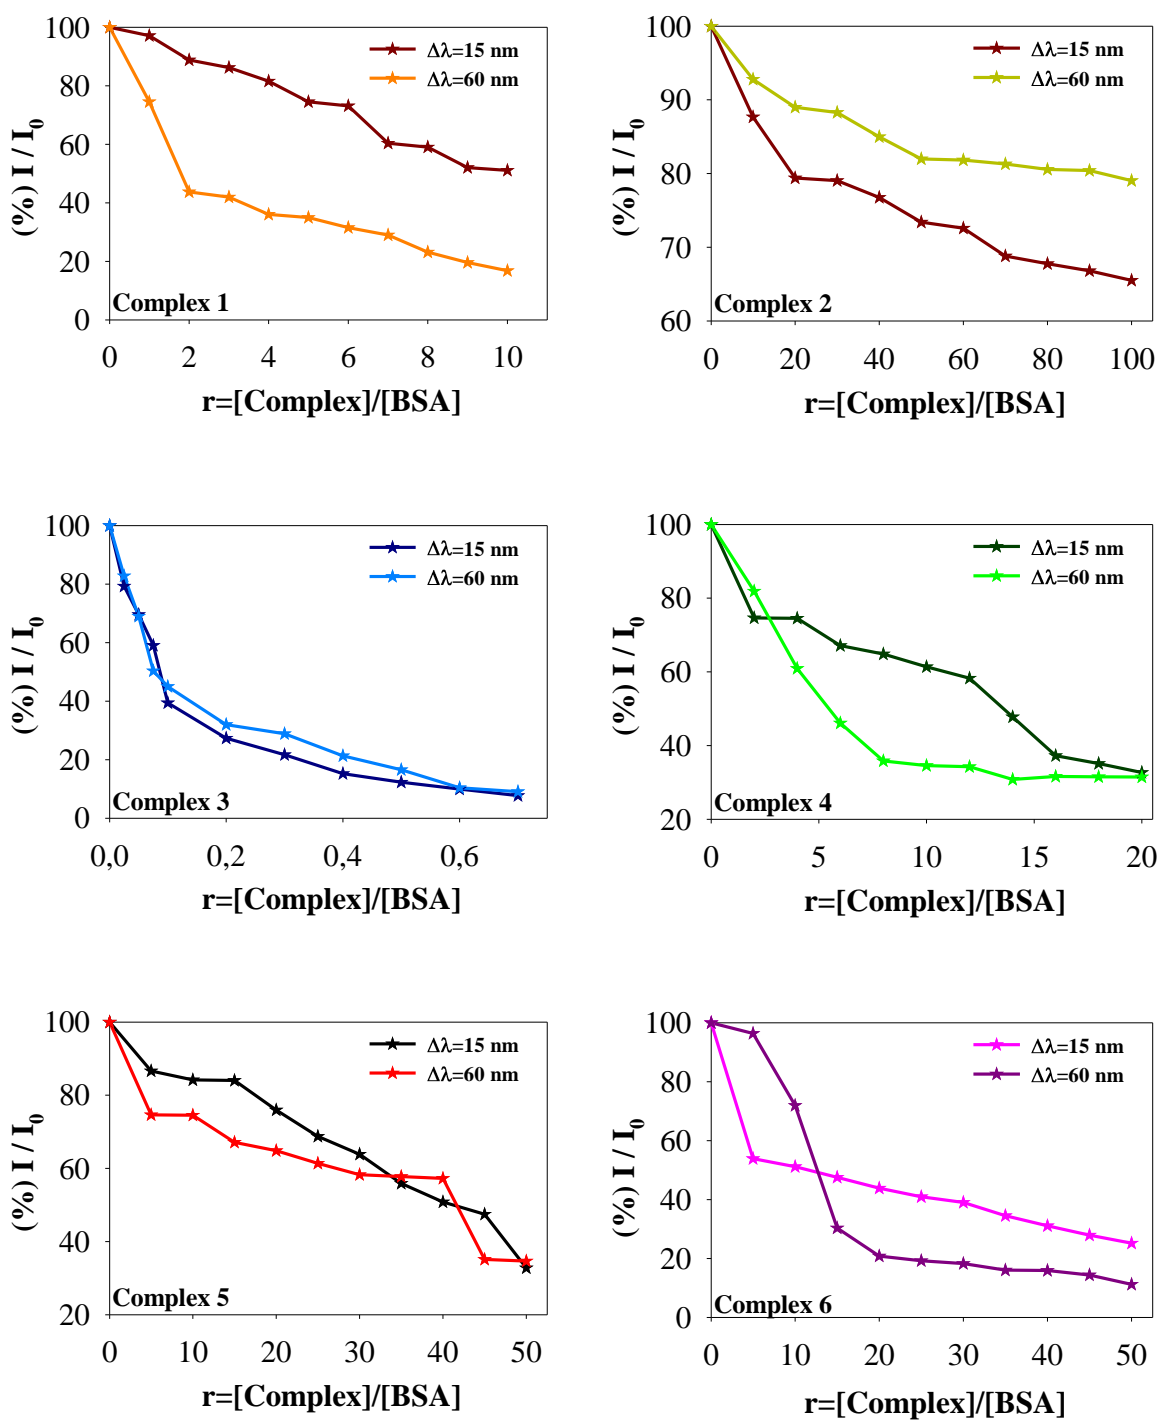

**Fig. S9** Effect of addition of the complexes 1-6 on the relative synchronous fluorescence intensity of BSA at  $\Delta\lambda = 15 \text{ nm}$  and  $\Delta\lambda = 60 \text{ nm}$ .
